# Supplementary material for: DNA elements for constitutive androstane receptor- and pregnane X receptor-mediated regulation of bovine CYP3A28 gene
Source: PubMed Central journal article supplement (PMC6433341; doi:10.1371/journal.pone.0214338), 2019-03-25
Supplement: pone.0214338.s002.pdf [file pone.0214338.s002.pdf]

**Title: DNA Elements for Constitutive Androstane Receptor- and Pregnane X Receptor-mediated Regulation of Bovine CYP3A28 Gene**

**Authors:** Mery Giantin, Jenni Küblbeck, Vanessa Zancanella, Viktoria Prantner, Fabiana Sansonetti, Axel Schoeniger, Roberta Tolosi, Giorgia Guerra, Silvia Da Ros, Mauro Dacasto, Paavo Honkakoski

**Journal:** Plos One

**S1 Table. Primers used for the *ex novo* sequencing of bovine CYP3A28 promoter region.**

| <b>Amplified region</b> | <b>5'→3' sequences</b>             | <b>Primer length (bp)</b> | <b>%GC</b> | <b>Tm (°C)</b> | <b>Amplicon size (bp)</b> |
|-------------------------|------------------------------------|---------------------------|------------|----------------|---------------------------|
| -147                    | <i>F:</i> TGCATGTTATGCTCGGCCAACT   | 22                        | 50.0       | 70.8           | 642                       |
| +495                    | <i>R:</i> ACACTGCACATGGGCCATTGTTT  | 23                        | 47.8       | 71.5           |                           |
| -1001                   | <i>F:</i> GCCCTTACCTCTACCAACTGAAT  | 23                        | 47.8       | 63.6           | 1165                      |
| +164                    | <i>R:</i> ACTCACAGATAGAGGAGCACCAG  | 23                        | 52.2       | 64.0           |                           |
| -1567                   | <i>F:</i> TAATAAAATTTCCCTGTGCTCTGC | 24                        | 37.5       | 64.3           | 877                       |
| -690                    | <i>R:</i> ACCTAGTCTCTTCAGTGGATGGAG | 24                        | 50.0       | 64.1           |                           |
| -1943                   | <i>F:</i> TGGTCCAGAGTACTGATAATGAGC | 24                        | 45.8       | 63.6           | 670                       |
| -1303                   | <i>R:</i> ACTTGTGGACACCTAGGGAATTT  | 23                        | 43.4       | 63.9           |                           |
| -2654                   | <i>F:</i> CTGAAGCTGCCATCCATTTCTC   | 22                        | 50.0       | 67.3           | 795                       |

|       |                                      |    |      |      |      |
|-------|--------------------------------------|----|------|------|------|
| -1859 | <i>R:</i> ATCCACGTAACCCTGCTGAA       | 20 | 50.0 | 64.8 |      |
| -2598 | <i>F:</i> CCAAAGACTCCAAAGGTATGC      | 22 | 47.6 | 62.8 | 611  |
| -1987 | <i>R:</i> TGTGAAAAACAAAACCTCAAAGG    | 23 | 34.7 | 64.2 |      |
| -3084 | <i>F:</i> ACCCAGAGAAGGCACCAAAAGGGG   | 24 | 58.3 | 74.4 | 1229 |
| -1855 | <i>R:</i> AGGCATCCACGTAACCCTGCTGAA   | 24 | 54.1 | 73.3 |      |
| -3247 | <i>F:</i> AGGAGTCCTTCAATCTCTGTCCAT   | 24 | 45.8 | 65.5 | 756  |
| -2491 | <i>R:</i> GCTGTGGGCTAGAAGCTATACAGT   | 24 | 50.0 | 64.0 |      |
| -3678 | <i>F:</i> TGGGGAGTATAGACAGGTGACAAGCA | 26 | 50.0 | 70.5 | 620  |
| -3058 | <i>R:</i> TGCCCCCTTTTGGTGCCTTCTCT    | 23 | 56.5 | 74.3 |      |
| -4184 | <i>F:</i> GCTCTGACCATGCCAGGCCG       | 20 | 70.0 | 74.8 | 619  |
| -3565 | <i>R:</i> CTGCCCAGGGGCTCCTTCCA       | 20 | 70.0 | 75.0 |      |
| -4526 | <i>F:</i> TCAGCCAGTGGAAGTCAGGACAGG   | 24 | 58.3 | 72.9 | 500  |
| -4026 | <i>R:</i> GGCATGGTCTTTGTGCCCTTCGTT   | 24 | 54.1 | 74.4 |      |
| -5053 | <i>F:</i> TGAGATCTAGCTCCACATCCTA     | 22 | 45.4 | 60.9 | 664  |
| -4389 | <i>R:</i> GGCATTAGGCTCAGATATCAGGA    | 23 | 47.8 | 65.5 |      |
| -5369 | <i>F:</i> TCCTCTGATTCCTCTTTCCTCC     | 23 | 47.8 | 65.0 | 443  |
| -4926 | <i>R:</i> CTATGTGAGGTAAGCAGTGTTGG    | 23 | 47.8 | 62.8 |      |

|       |                                        |    |      |      |      |
|-------|----------------------------------------|----|------|------|------|
| -6347 | <i>F</i> : AAACCCATAAGAGAAAGCACCTC     | 23 | 43.3 | 63.7 | 1096 |
| -5251 | <i>R</i> : CAGCAGATAAGGGATGTTGCAA      | 22 | 45.4 | 66.3 |      |
| -6830 | <i>F</i> : ACCTTAGTAAGACCAGCAAGCA      | 22 | 45.4 | 62.2 | 679  |
| -6151 | <i>R</i> : CCATGTTGCCTTCTACTGTGG       | 21 | 52.3 | 64.8 |      |
| -7561 | <i>F</i> : TCCTTGAAGAAGATTTGACTTCCAC   | 25 | 40.0 | 65.7 | 915  |
| -6646 | <i>R</i> : CAAACAGGTAGTCGCCACAG        | 20 | 55.0 | 63.8 |      |
| -7976 | <i>F1</i> : TGAATTCGTGCAGTGAAGCC       | 20 | 50.0 | 66.7 | 665  |
| -8581 | <i>F2</i> : CATAGAGTGAGCTAGGCATGATTGAA | 26 | 42.3 | 66.5 | 1270 |
| -8605 | <i>F3</i> : GGGTCAAGTTCATACTGTCCTCA    | 23 | 47.8 | 64.5 | 1294 |
| -7311 | <i>R</i> : GGAATGTCAAACTCACAAGCC       | 23 | 47.8 | 67.9 |      |
| -8471 | <i>F</i> : CCCACTGGTGAGGCTGGGATAGG     | 23 | 65.2 | 73.6 | 625  |
| -7846 | <i>R</i> : TCCAGGGGAAGAGGGAAGAGGGT     | 23 | 60.8 | 72.9 |      |
| -8982 | <i>F</i> : GTCATCTGTGGCAATCTTGATGC     | 23 | 47.8 | 68.1 | 694  |
| -8288 | <i>R</i> : TCGAGGATTCAGTTCCTCACTT      | 22 | 45.4 | 64.3 |      |
| -9656 | <i>F</i> : CCTACTCAAACATCATGTCCATAGCAT | 26 | 42.3 | 65.4 | 1248 |
| -8408 | <i>R</i> : GGGGGCACCCAATTAATATTCTAC    | 24 | 45.8 | 66.1 |      |
| -9456 | <i>F</i> : TCCCTTTAGGATTGAATGGTTGG     | 23 | 43.4 | 66.9 | 593  |

|        |                                     |    |      |      |     |
|--------|-------------------------------------|----|------|------|-----|
| -8863  | <i>R:</i> GAAAGGAGTACGTCAAGGCTGT    | 22 | 50.0 | 63.8 |     |
| -10413 | <i>F:</i> TAGAAAACCTCTTGGTGCTGTATGC | 24 | 41.6 | 63.6 | 874 |
| -9539  | <i>R:</i> CATTGGAAAAAGAAAGACTCTGGTC | 25 | 40.0 | 65.2 |     |
| -10562 | <i>F:</i> GTTGTGTCATAGTACCAGGCATA   | 23 | 43.4 | 60.8 | 376 |
| -10186 | <i>R:</i> TTTACCCTTTGAGAACTGACCAAC  | 24 | 41.6 | 64.4 |     |

Positions of the amplified regions are relative to the transcription starting site (+1) of the bovine *CYP3A28* gene, coding sequence GenBank Acc. NM\_001099367. The primer melting temperature (T<sub>m</sub>) recommended for Phusion<sup>®</sup> High-Fidelity DNA Polymerase was calculated using a specific calculator freely available at <http://www.thermoscientificbio.com/webtools/tmc/>.
