# Supplementary material for: DNA elements for constitutive androstane receptor- and pregnane X receptor-mediated regulation of bovine CYP3A28 gene
Source: PubMed Central journal article supplement (PMC6433341; doi:10.1371/journal.pone.0214338), 2019-03-25
Supplement: pone.0214338.s003.pdf [file pone.0214338.s003.pdf]

**Title: DNA Elements for Constitutive Androstane Receptor- and Pregnane X Receptor-mediated Regulation of Bovine CYP3A28 Gene**

**Authors:** Mery Giantin, Jenni Küblbeck, Vanessa Zancanella, Viktoria Prantner, Fabiana Sansonetti, Axel Schoeniger, Roberta Tolosi, Giorgia Guerra, Silvia Da Ros, Mauro Dacasto, Paavo Honkakoski

**Journal:** Plos One

**S2 Table. Oligonucleotide sequences for the amplification of the bovine CYP3A28 promoter through long (ln) PCR reactions.**

| Start  | 5'→3' sequences                      | Length (bp) | %GC  | Amplicon size (bp) | Reaction acronym |
|--------|--------------------------------------|-------------|------|--------------------|------------------|
| -2662  | <i>F:</i> TGTTGGTACTGAAGCTGCCATC     | 22          | 50.0 | 2962               | lnPCR#1          |
| +387   | <i>R:</i> GAATGTCACAAACCCTCCTAACAATG | 26          | 42.3 |                    |                  |
| -7335  | <i>F:</i> TGTGAGAACTGTGATCGTGCA      | 21          | 47.6 | 7635               | lnPCR#2          |
| +387   | <i>R:</i> GAATGTCACAAACCCTCCTAACAATG | 26          | 42.3 |                    |                  |
| -10651 | <i>F:</i> TGTTGTGTCATAGTACCAGGCATA   | 24          | 41.7 | 8486               | lnPCR#3          |
| -2078  | <i>R:</i> GTCTCACTTTCCTCCTTCTGCA     | 23          | 47.8 |                    |                  |
| -10651 | <i>F:</i> TGTTGTGTCATAGTACCAGGCATA   | 24          | 41.7 | 3468               | lnPCR#4          |
| -7096  | <i>R:</i> TCTTCTATCTGAAATGGGTCCAATCC | 26          | 42.3 |                    |                  |

Positions of the amplified regions are relative to the transcription starting site (+1) of the bovine CYP3A28 gene, coding sequence GenBank ID NM\_001099367.
