# Supplementary material for: DNA elements for constitutive androstane receptor- and pregnane X receptor-mediated regulation of bovine CYP3A28 gene
Source: PubMed Central journal article supplement (PMC6433341; doi:10.1371/journal.pone.0214338), 2019-03-25
Supplement: pone.0214338.s004.pdf [file pone.0214338.s004.pdf]

**Title: DNA Elements for Constitutive Androstane Receptor- and Pregnane X Receptor-mediated Regulation of Bovine CYP3A28 Gene**

**Authors:** Mery Giantin, Jenni Küblbeck, Vanessa Zancanella, Viktoria Prantner, Fabiana Sansonetti, Axel Schoeniger, Roberta Tolosi, Giorgia Guerra, Silvia Da Ros, Mauro Dacasto, Paavo Honkakoski

**Journal:** Plos One

**S3 Table. Primer sequences used for nested PCR reactions of the bovine CYP3A28 promoter.**

| Template | Start* | 5'→3' sequences                        | Restriction enzymes | Length (bp) | %GC  | Amplicon size (bp) | Product acronym |
|----------|--------|----------------------------------------|---------------------|-------------|------|--------------------|-----------------|
| lnPCR#1  | -284   | <i>F</i> : CATAGATCTAGAGAGGTTTAGAGGAGA | BglII               | 27          | 40.7 | 355                | PP              |
|          | +71    | <i>R</i> : GATTCAAGCTTCTGAGTTTCCTTTCAG | HindIII             | 27          | 40.7 |                    |                 |
| lnPCR#1  | -1359  | <i>F</i> : GTTAGATCTCACTAGCAACACTTGG   | BglII               | 25          | 44.0 | 1430               | lnPP            |
|          | +71    | <i>R</i> : GATTCAAGCTTCTGAGTTTCCTTTCAG | HindIII             | 27          | 40.7 |                    |                 |
| lnPCR#2  | -3133  | <i>F</i> : ATTGCTCGAGGATTGTTTACAGTTG   | XhoI                | 25          | 40.0 | 2871               | F1              |
|          | -262   | <i>R</i> : CTCTGATCATCTCTGTCTCTATGGC   | BclI                | 25          | 48.0 |                    |                 |
| lnPCR#3  | -4998  | <i>F</i> : CCCACTCGAGTTTTCTGTTTTTACA   | XhoI                | 25          | 40.0 | 1865               | F2              |
|          | -3133  | <i>R</i> : GAGGATCCCATGGACAGAGATTGAA   | BamHI               | 25          | 48.0 |                    |                 |
| lnPCR#3  | -6899  | <i>F</i> : CATCTCGAGTTACATTAGTTTCAGGC  | XhoI                | 26          | 42.3 | 1962               | F3              |
|          | -4937  | <i>R</i> : AAGCAGTGTTGGGATTATTTGATTC   | –                   | 25          | 36.0 |                    |                 |
| lnPCR#3  | -8314  | <i>F</i> : CACAGCAAGTGAGGAACTGAATC     | –                   | 23          | 47.8 | 1562               | F4              |

|         |        |                                         |       |    |      |      |    |
|---------|--------|-----------------------------------------|-------|----|------|------|----|
|         | -6752  | R: ATGTTCACACAGGGAATAGAGTCAA            | –     | 25 | 40.0 |      |    |
| lnPCR#4 | -10368 | F: <u>GTGGTACCTG</u> CACTAATGAGGAGGATT  | KpnI  | 27 | 48.1 |      |    |
|         | -8259  | R: GTCT <u>GGATCC</u> ATTCAGATCGTCACAAG | BamHI | 27 | 48.1 | 2115 | F5 |

Amplicons obtained from long PCR reactions (listed in Supplemental Table 2) were used as templates to amplify shorter promoter fragments. When needed, a selected restriction enzyme site was inserted in the primer sequence (underlined in the 5'→3' sequence) for cloning in the parent plasmid pGL4.10[luc2] (proximal promoter, PP and long proximal promoter, lnPP) or the minimal promoter plasmid pGL4.10-PP (fragment F1-F5).

\*: Positions relative to the transcription starting site (+1) of the bovine *CYP3A28* gene.
