# Supplementary material for: DNA elements for constitutive androstane receptor- and pregnane X receptor-mediated regulation of bovine CYP3A28 gene
Source: PubMed Central journal article supplement (PMC6433341; doi:10.1371/journal.pone.0214338), 2019-03-25
Supplement: pone.0214338.s005.pdf [file pone.0214338.s005.pdf]

**Title: DNA Elements for Constitutive Androstane Receptor- and Pregnane X Receptor-mediated Regulation of Bovine CYP3A28 Gene**

**Authors:** Mery Giantin, Jenni Küblbeck, Vanessa Zancanella, Viktoria Prantner, Fabiana Sansonetti, Axel Schoeniger, Roberta Tolosi, Giorgia Guerra, Silvia Da Ros, Mauro Dacasto, Paavo Honkakoski

**Journal:** Plos One

**S4 Table. Oligonucleotides used for the internal site-directed mutagenesis of transcription factor binding sites.**

| Target motif | 5'→3' sequences                                                               | Restriction enzyme site | Length (bp) | %GC  |
|--------------|-------------------------------------------------------------------------------|-------------------------|-------------|------|
| ER6          | <i>F</i> : TTATTGATTCCTACAGAATA <u>actAgTCa</u> AGGGAtGTaAAACTGAAGTGCATGTTAT  | BcuI                    | 57          | 31.6 |
|              | <i>R</i> : ATAACATGCACTTCAGTTTtACaTCCCTtG <u>AcTagt</u> TATTCTGTAGGAAATCAATAA |                         | 57          | 31.6 |
| DR1          | <i>F</i> : GGCTTTATTTTATTTTCTGTtAC <u>gccgcGGt</u> TTACTGATAAACTGATTG         | Cfr42I                  | 50          | 38.0 |
|              | <i>R</i> : CAATCAGTGTTATCAGTAAa <u>CCgcggc</u> GTaACAGAAAATAAAATAAAGCC        |                         | 50          | 38.0 |
| DR5          | <i>F</i> : AGGGAATTCCTGGGTGAaa <u>CtAGTCTAGc</u> GTgAGATAAAACTCCTTAGAAGGTT    | BcuI                    | 55          | 41.8 |
|              | <i>R</i> : AACCTTCTAAGGAGTTTTATCTcACgCTAG <u>ACTaGtt</u> TCACCCAGGAAATTCCT    |                         | 55          | 41.8 |

Primers used for mutagenesis of ER6, DR1 present in the *CYP3A28* proximal promoter and DR5 located in F3 are indicated and lowercase letters refer to mutated bases. A selected restriction enzyme site was inserted in both primers (underlined in the 5'→3' sequence) for the diagnosis of successful base changing.
