# Supplementary material for: DNA elements for constitutive androstane receptor- and pregnane X receptor-mediated regulation of bovine CYP3A28 gene
Source: PubMed Central journal article supplement (PMC6433341; doi:10.1371/journal.pone.0214338), 2019-03-25
Supplement: pone.0214338.s006.pdf [file pone.0214338.s006.pdf]

**Title: DNA Elements for Constitutive Androstane Receptor- and Pregnane X Receptor-mediated Regulation of Bovine CYP3A28 Gene**

**Authors:** Mery Giantin, Jenni Küblbeck, Vanessa Zancanella, Viktoria Prantner, Fabiana Sansonetti, Axel Schoeniger, Roberta Tolosi, Giorgia Guerra, Silvia Da Ros, Mauro Dacasto, Paavo Honkakoski

**Journal:** Plos One

**S5 Table. Oligonucleotides used in the inverse PCR procedure.**

| Template | 5'→3' sequences                                                      | Length<br>(bp) | %GC  | Product<br>acronym |
|----------|----------------------------------------------------------------------|----------------|------|--------------------|
| PP       | <i>sense:</i> AACTGAAGTGCATGTTATGCTCGCCAACTACCAAGGCAGAGAGG           | 44             | 50.0 | PP_del             |
|          | <i>antisense:</i> GCCACTGGCTTTAATTCTCCTCTAAACCTCTCTAGATCTTGATATCCTCG | 50             | 44.0 |                    |
| PP+F3    | <i>sense:</i> AACTGAAGTGCATGTTATGCTCGGCCAACTACCAAGGCAGAGAGG          | 45             | 51.1 | PP_del+F3          |
|          | <i>ansitsense:</i> GCCACTGGCTTTAATTCTCCTCTAAACCTCTCTAGATCTCATAATTCT  | 48             | 39.6 |                    |
