# Supplementary material for: DNA elements for constitutive androstane receptor- and pregnane X receptor-mediated regulation of bovine CYP3A28 gene
Source: PubMed Central journal article supplement (PMC6433341; doi:10.1371/journal.pone.0214338), 2019-03-25
Supplement: pone.0214338.s007.pdf [file pone.0214338.s007.pdf]

**Title: DNA Elements for Constitutive Androstane Receptor- and Pregnane X Receptor-mediated Regulation of Bovine *CYP3A28* Gene**

**Authors:** Mery Giantin, Jenni Küblbeck, Vanessa Zancanella, Viktoria Prantner, Fabiana Sansonetti, Axel Schoeniger, Roberta Tolosi, Giorgia Guerra, Silvia Da Ros, Mauro Dacasto, Paavo Honkakoski

**Journal:** Plos One

**S6 Table. Oligonucleotides used in qPCR ChIP.**

| DNA region of interest | Primer sequence (5' – 3')           | Length (bp) | % GC | Melting temperature (°C) |
|------------------------|-------------------------------------|-------------|------|--------------------------|
| <b>ER6</b>             | <i>F:</i> TGGACTACAGGCAGCCATAGA     | 21          | 52.4 | 60.3                     |
|                        | <i>R:</i> TGGTAGTTGGCCGAGCATAAC     | 21          | 52.4 | 60.4                     |
| <b>DR5</b>             | <i>F:</i> TTTACCAGGCCCTGTCTCATG     | 21          | 52.4 | 59.7                     |
|                        | <i>R:</i> AGTGTTGGCCATCTCTCCTAATC   | 23          | 47.8 | 59.9                     |
| <b>EXON 13</b>         | <i>F:</i> AAAGGTTGTGCTCAGAGATGGA    | 22          | 45.5 | 59.6                     |
|                        | <i>R:</i> AAGTAAATCAAGCCCCCTGAAATTC | 25          | 40.0 | 59.8                     |
