# Supplementary material for: DNA elements for constitutive androstane receptor- and pregnane X receptor-mediated regulation of bovine CYP3A28 gene
Source: PubMed Central journal article supplement (PMC6433341; doi:10.1371/journal.pone.0214338), 2019-03-25
Supplement: pone.0214338.s008.pdf [file pone.0214338.s008.pdf]

**Title: DNA Elements for Constitutive Androstane Receptor- and Pregnane X Receptor-mediated Regulation of Bovine *CYP3A28* Gene**

**Authors:** Mery Giantin, Jenni Küblbeck, Vanessa Zancanella, Viktoria Prantner, Fabiana Sansonetti, Axel Schoeniger, Roberta Tolosi, Giorgia Guerra, Silvia Da Ros, Mauro Dacasto, Paavo Honkakoski

**Journal:** Plos One

**S7 Table. bPXR-mediated transactivation of *CYP3A28* proximal promoter (PP) and fragment 3 (F3) using rifampicin (RIF).**

| Mean luciferase activity* $\pm$ SD |          |                         |
|------------------------------------|----------|-------------------------|
| <b>pGL4.10</b>                     | pCI-neo  | 100                     |
|                                    | bPXR     | 140.53 $\pm$ 30.24      |
|                                    | bPXR+RIF | 133.73 $\pm$ 52.57      |
| <b>XREM</b>                        | pCI-neo  | 933.39 $\pm$ 509.69     |
|                                    | bPXR     | 1432.97 $\pm$ 842.79    |
|                                    | bPXR+RIF | 2112.60 $\pm$ 972.68    |
| <b>PP</b>                          | pCI-neo  | 3282.56 $\pm$ 3038.26   |
|                                    | bPXR     | 4618.43 $\pm$ 3841.19   |
|                                    | bPXR+RIF | 4329.15 $\pm$ 3575.36   |
| <b>PP+F3</b>                       | pCI-neo  | 26100.24 $\pm$ 21617.61 |
|                                    | bPXR     | 30173.12 $\pm$ 22813.48 |
|                                    | bPXR+RIF | 32464.00 $\pm$ 24524.25 |

\*C3A cells were transfected with the control reporter pCMV $\beta$  (150 ng/well), each reporter plasmids or *CYP3A4*-XREM-luc (XREM, 50 ng/well) and either bPXR expression plasmids or pCI-neo empty vector (25 ng/well). After transfection, cells were treated with vehicle (0.1% DMSO) or rifampicin (RIF, 10  $\mu$ M) for 24 hours, and reporter activities were measured. Firefly luciferase activities were normalized with  $\beta$ -galactosidase activities. Data are expressed as mean luciferase activities  $\pm$  SD (n = 3).
