# Supplementary material for: DNA elements for constitutive androstane receptor- and pregnane X receptor-mediated regulation of bovine CYP3A28 gene
Source: PubMed Central journal article supplement (PMC6433341; doi:10.1371/journal.pone.0214338), 2019-03-25
Supplement: pone.0214338.s009.pdf [file pone.0214338.s009.pdf]

**Title: DNA Elements for Constitutive Androstane Receptor- and Pregnane X Receptor-mediated Regulation of Bovine *CYP3A28* Gene**

**Authors:** Mery Giantin, Jenni Küblbeck, Vanessa Zancanella, Viktoria Prantner, Fabiana Sansonetti, Axel Schoeniger, Roberta Tolosi, Giorgia Guerra, Silvia Da Ros, Mauro Dacasto, Paavo Honkakoski

**Journal:** Plos One

**S8 Table. Modulation of *CYP2B22* mRNA in BFH12 cells exposed for 6 hours to different concentrations of phenobarbital (PB).**

| <i>CYP2B22</i> mRNA expression* |             |
|---------------------------------|-------------|
| (AU, mean ± SD)                 |             |
| <b>DMSO 0.1%</b>                | 1.00        |
| <b>PB 0.1 mM</b>                | 1.12 ± 0.27 |
| <b>PB 0.25 mM</b>               | 0.98 ± 0.10 |
| <b>PB 0.5 mM</b>                | 1.04 ± 0.19 |
| <b>PB 1 mM</b>                  | 1.06 ± 0.21 |
| <b>PB 2 mM</b>                  | 1.31 ± 0.04 |

\*BFH12 cells were exposed to different concentrations (0.1, 0.25, 0.5, 1 and 2 mM) of phenobarbital (PB) for 6 hours. The expression of *CYP2B22* mRNA was detected by qPCR in control (0.1% DMSO) and treated cells, using *RPLP0* as internal control gene. The relative expression of DMSO-treated cells was set to 1 and its value was used for the normalization of the other groups. Data are expressed as the mean ± SD of two independent experiments (arbitrary units, AU). Statistical analysis: ANOVA + Tukey's post test.

\*C3A cells were transfected with the control reporter pCMVβ (150 ng/well), each reporter plasmids or *CYP3A4*-XREM-luc (XREM, 50 ng/well) and either bPXR expression plasmids or pCI-neo empty vector (25 ng/well). After transfection, cells were treated with vehicle (0.1% DMSO) or rifampicin (RIF, 10 μM) for 24 hours, and reporter activities were measured. Firefly luciferase

activities were normalized with  $\beta$ -galactosidase activities. Data are expressed as mean luciferase activities  $\pm$  SD (n = 3).
