# Supplementary material for: DNA elements for constitutive androstane receptor- and pregnane X receptor-mediated regulation of bovine CYP3A28 gene
Source: PubMed Central journal article supplement (PMC6433341; doi:10.1371/journal.pone.0214338), 2019-03-25
Supplement: pone.0214338.s010.pdf [file pone.0214338.s010.pdf]

**Title: DNA Elements for Constitutive Androstane Receptor- and Pregnane X Receptor-mediated Regulation of Bovine *CYP3A28* Gene**

**Authors:** Mery Giantin, Jenni Küblbeck, Vanessa Zancanella, Viktoria Prantner, Fabiana Sansonetti, Axel Schoeniger, Roberta Tolosi, Giorgia Guerra, Silvia Da Ros, Mauro Dacasto, Paavo Honkakoski

**Journal:** Plos One

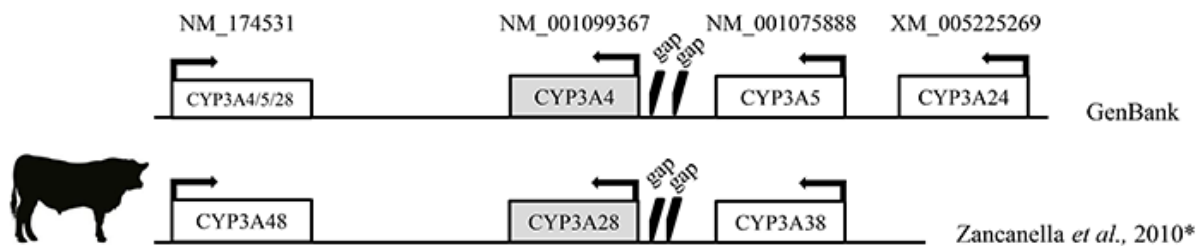

**S1 Fig. Schematic organization of the bovine *CYP3A* locus.** Four *CYP3A* coding genes are known: *CYP3A28*, *CYP3A38*, *CYP3A48* and the predicted *CYP3A24*. The GenBank IDs and nomenclature are displayed together with the nomenclature proposed by Zancanella et al. (2010).

\*: Zancanella V, Giantin M, Lopparelli RM, Patarnello T, Dacasto M, Negrisolo E. Proposed new nomenclature for *Bos taurus* cytochromes P450 involved in xenobiotic drug metabolism. *J Vet Pharmacol Ther.* 2010; 33: 528-525.
