# Supplementary material for: DNA elements for constitutive androstane receptor- and pregnane X receptor-mediated regulation of bovine CYP3A28 gene
Source: PubMed Central journal article supplement (PMC6433341; doi:10.1371/journal.pone.0214338), 2019-03-25
Supplement: pone.0214338.s011.pdf [file pone.0214338.s011.pdf]

**Title: DNA Elements for Constitutive Androstane Receptor- and Pregnane X Receptor-mediated Regulation of Bovine *CYP3A28* Gene**

**Authors:** Mery Giantin, Jenni Küblbeck, Vanessa Zancanella, Viktoria Prantner, Fabiana Sansonetti, Axel Schoeniger, Roberta Tolosi, Giorgia Guerra, Silvia Da Ros, Mauro Dacasto, Paavo Honkakoski

**Journal:** Plos One

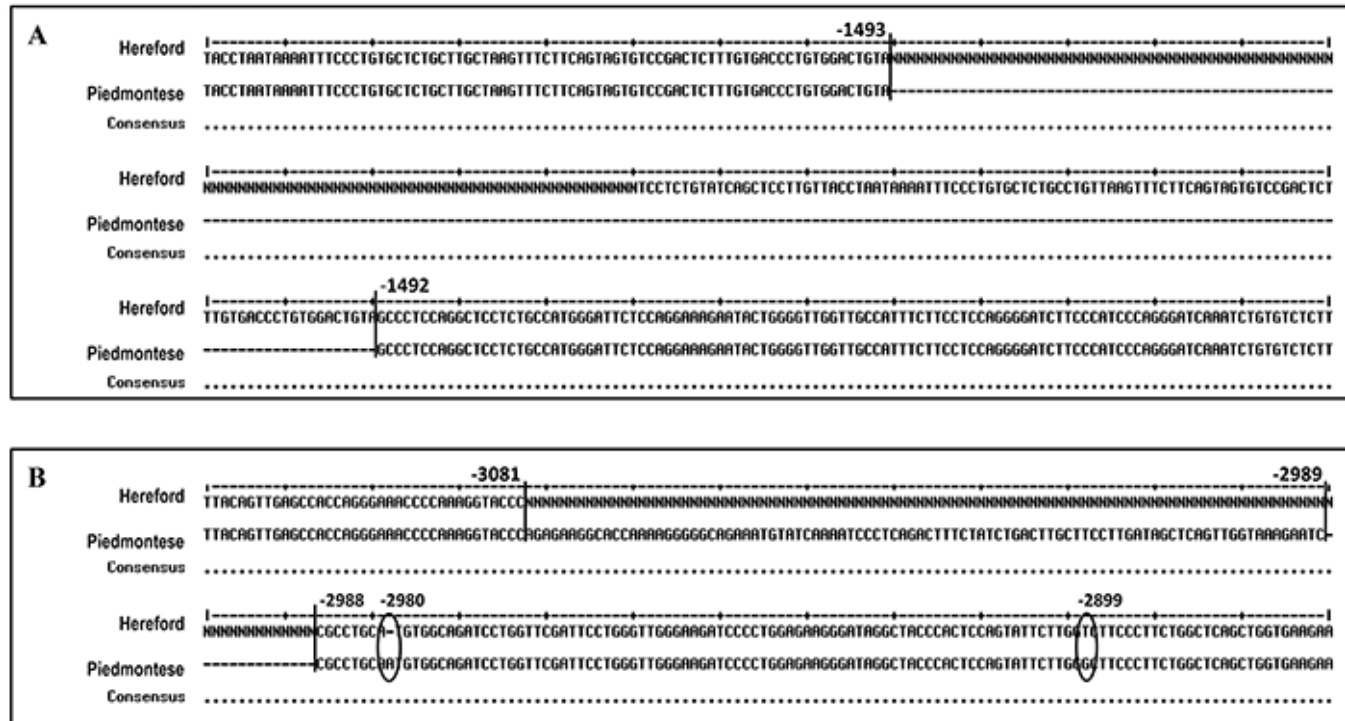

**S2 Fig. Resolution of the two encountered gaps in the bovine *CYP3A28* promoter region.** The re-sequencing of *CYP3A28* promoter region was able to solve the first gap starting at -1492 bp revealing a sequencing artefact (A), as well as the second gap at base -2988 with a new genomic sequence (B). Two of the five single nucleotides polymorphisms (-2899T>G and -2981\_-2979insA) are here shown circled.
