# Supplementary material for: DNA elements for constitutive androstane receptor- and pregnane X receptor-mediated regulation of bovine CYP3A28 gene
Source: PubMed Central journal article supplement (PMC6433341; doi:10.1371/journal.pone.0214338), 2019-03-25
Supplement: pone.0214338.s014.pdf [file pone.0214338.s014.pdf]

# Title: DNA Elements for Constitutive Androstane Receptor- and Pregnane X Receptor-mediated Regulation of Bovine *CYP3A28* Gene

**Authors:** Mery Giantin, Jenni Küblbeck, Vanessa Zancanella, Viktoria Prantner, Fabiana Sansonetti, Axel Schoeniger, Roberta Tolosi, Giorgia Guerra, Silvia Da Ros, Mauro Dacasto, Paavo Honkakoski

**Journal:** Plos One

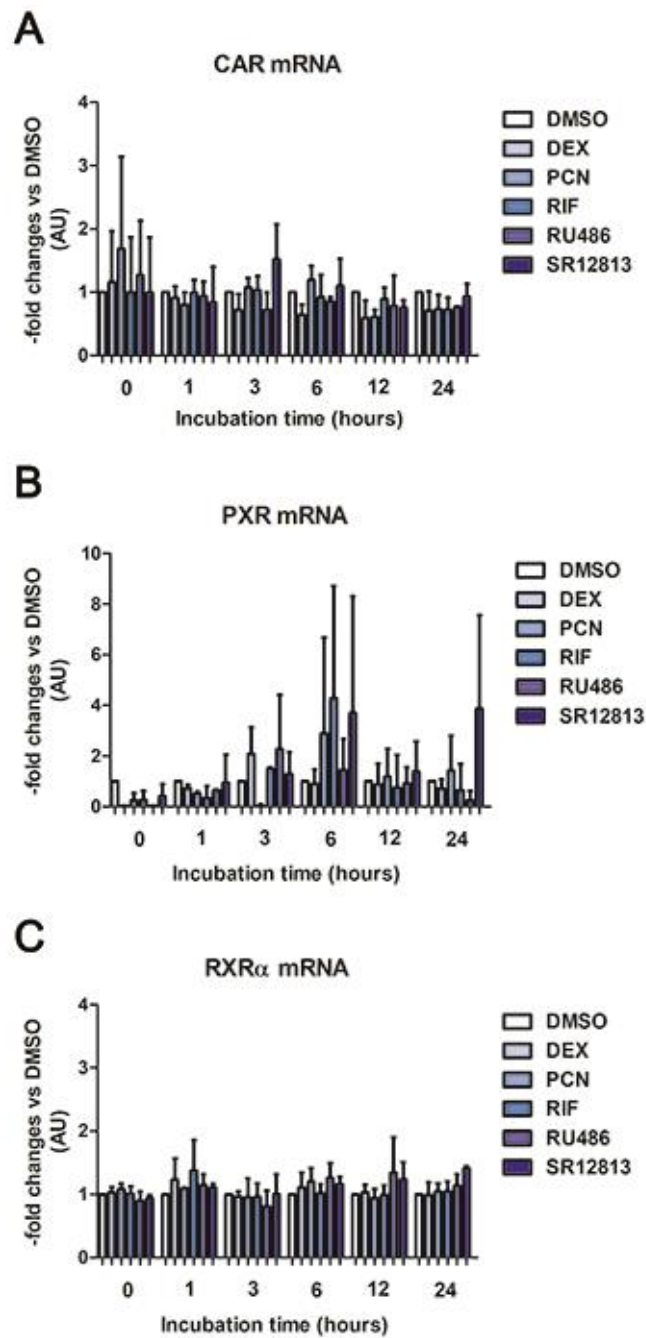

**S5 Fig. Induction of *CAR*, *PXR*, *RXR $\alpha$*  mRNAs in BFH12 cells exposed for 0, 1, 3, 6, 12 and 24 hours to five prototypical CYP3A inducers.** BFH12 cells were treated with different CYP3A inducers (PCN, RU486, SR12813, DEX and RIF) at the fixed concentration 10  $\mu$ M for 0, 1, 3, 6, 12 and 24 hours. The expression of *CAR* (A), *PXR* (B) and *RXR $\alpha$*  (C) was detected by qPCR in control (0.1% DMSO) and treated cells, using *RPLP0* as internal control gene. The relative expression of DMSO-treated cells was set to 1 and its value was used for the normalization of the other groups. Data are expressed as the mean  $\pm$  SD of three independent experiments (arbitrary units, AU). Statistical analysis: ANOVA + Tukey's post test.
