# Supplementary material for: DNA elements for constitutive androstane receptor- and pregnane X receptor-mediated regulation of bovine CYP3A28 gene
Source: PubMed Central journal article supplement (PMC6433341; doi:10.1371/journal.pone.0214338), 2019-03-25
Supplement: pone.0214338.s015.pdf [file pone.0214338.s015.pdf]

**Title: DNA Elements for Constitutive Androstane Receptor- and Pregnane X Receptor-mediated Regulation of Bovine *CYP3A28* Gene**

**Authors:** Mery Giantin, Jenni Küblbeck, Vanessa Zancanella, Viktoria Prantner, Fabiana Sansonetti, Axel Schoeniger, Roberta Tolosi, Giorgia Guerra, Silvia Da Ros, Mauro Dacasto, Paavo Honkakoski

**Journal:** Plos One

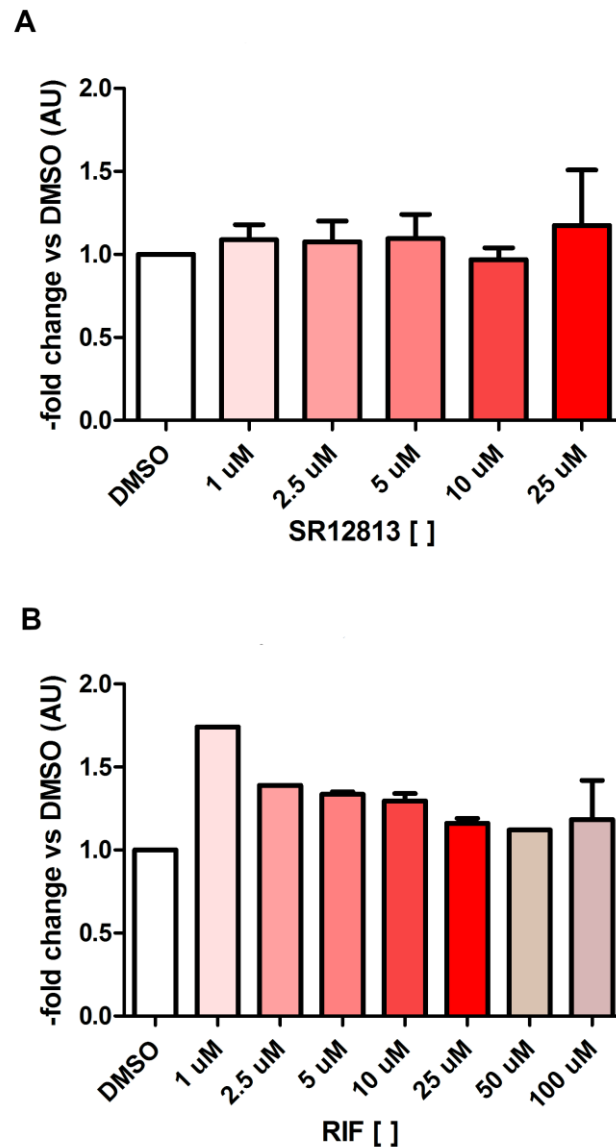

**S6 Fig. Induction of *CYP3A28* mRNA in BFH12 cells exposed to increasing concentrations of SR12813 and RIF for 6 hours.** BFH12 cells were treated with different concentrations of SR12813 (1, 2.5, 5, 10, 25  $\mu$ M) and RIF (1, 2.5, 5, 10, 25, 50 and 100  $\mu$ M) for 6 hours, as described in Materials and Methods. The expression of *CYP3A28* was detected by qPCR in control (0.1% DMSO) and treated cells, using *RPLP0* as internal control gene. The relative expression of DMSO-treated cells was set to 1 and its value was used for the normalization of the other groups. Data are expressed as the mean  $\pm$  SD of two independent experiments (arbitrary units, AU). Statistical analysis: ANOVA + Tukey's post test.
