# Supplementary material for: DNA elements for constitutive androstane receptor- and pregnane X receptor-mediated regulation of bovine CYP3A28 gene
Source: PubMed Central journal article supplement (PMC6433341; doi:10.1371/journal.pone.0214338), 2019-03-25
Supplement: pone.0214338.s016.pdf [file pone.0214338.s016.pdf]

**Title: DNA Elements for Constitutive Androstane Receptor- and Pregnane X Receptor-mediated Regulation of Bovine *CYP3A28* Gene**

**Authors:** Mery Giantin, Jenni Küblbeck, Vanessa Zancanella, Viktoria Prantner, Fabiana Sansonetti, Axel Schoeniger, Roberta Tolosi, Giorgia Guerra, Silvia Da Ros, Mauro Dacasto, Paavo Honkakoski

**Journal:** Plos One

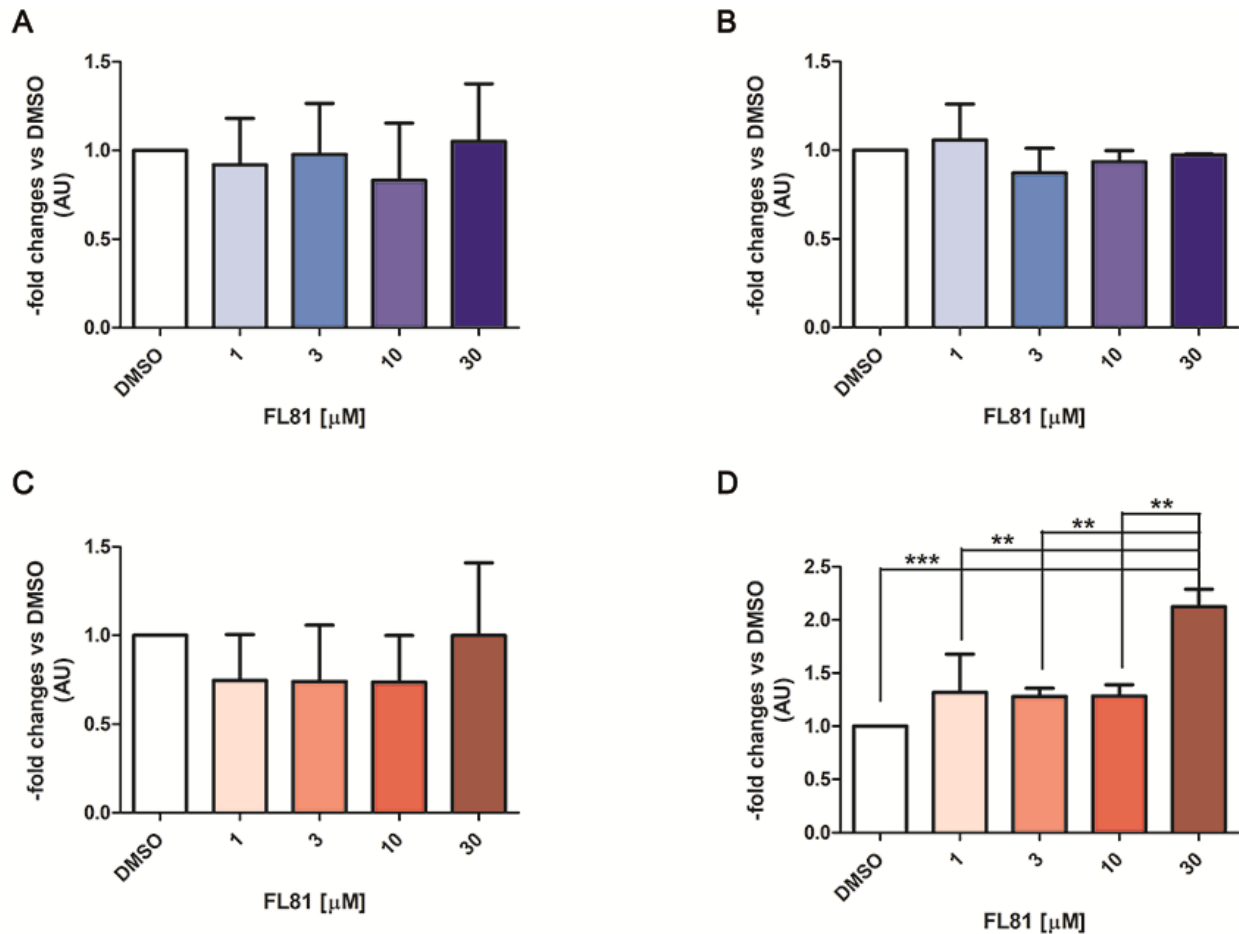

**S7 Fig. Induction of *CYP3A28* and *CYP2B22* mRNA in BFH12 cells exposed for 6 and 12 hours to FL81.** BFH12 cells were exposed to different concentrations (1, 3, 10 and 30  $\mu$ M) of the bCAR activator, FL81, for 6 and 12 hours. The expression of *CYP3A28* (A, B) and *CYP2B22* (C, D) mRNA was detected by qPCR in control (0.1% DMSO) and treated cells, using *RPLP0* as internal control gene. The relative expression of DMSO-treated cells was set to 1 and its value was used for the normalization of the other groups. Data are expressed as the mean  $\pm$  SD of three independent experiments (arbitrary units, AU). Statistical analysis: ANOVA + Tukey's post test. Significance was defined as  $P < 0.01$ : \*\*;  $P < 0.001$ : \*\*\*. A, C: 6 hours of incubation; B, D: 12 hours of incubation.
