# Supplementary material for: DNA elements for constitutive androstane receptor- and pregnane X receptor-mediated regulation of bovine CYP3A28 gene
Source: PubMed Central journal article supplement (PMC6433341; doi:10.1371/journal.pone.0214338), 2019-03-25
Supplement: pone.0214338.s017.pdf [file pone.0214338.s017.pdf]

**Title: DNA Elements for Constitutive Androstane Receptor- and Pregnane X Receptor-mediated Regulation of Bovine *CYP3A28* Gene**

**Authors:** Mery Giantin, Jenni Küblbeck, Vanessa Zancanella, Viktoria Prantner, Fabiana Sansonetti, Axel Schoeniger, Roberta Tolosi, Giorgia Guerra, Silvia Da Ros, Mauro Dacasto, Paavo Honkakoski

**Journal:** Plos One

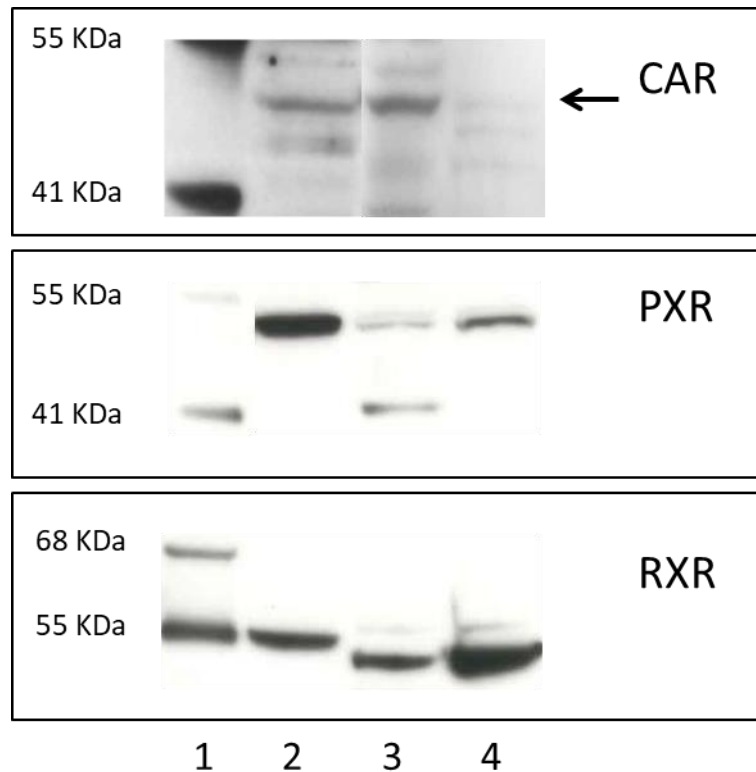

**S8 Fig. CAR, PXR and RXR immunoblotting analysis of subcellular fractions isolated from untreated bovine liver.** Bovine liver cytosolic and nuclear extracts were isolated according to Renisalo et al. (2012) with minor modifications. Proteins (30  $\mu$ g) were subjected to immunoblotting analysis following the protocol previously published by Zancanella et al. (2012)\*. Membranes were firstly probed with anti-human CAR (1:1000 final dilution), anti-human PXR (1:1000) and anti-human RXR (1:1500) polyclonal antibodies and then with a peroxidase-conjugated goat anti-rabbit IgG (Chemicon International; 1:6000 final dilution). As positive control, total proteins isolated from C3A cells stably transfected with hCAR or hPXR (Küblbeck et al., 2010) was used. 1: molecular weight marker (ChemiBlot Molecular Weight Marker, Millipore); 2: C3A cells transfected with hPXR or hCAR, total proteins; 3: bovine liver tissue, cytosol; 4: bovine liver tissue, nuclear fraction.

\* Zancanella V, Giantin M, Lopparelli RM, Nebbia C, Dacasto M. Constitutive expression and phenobarbital modulation of drug metabolizing enzymes and related nuclear receptors in cattle liver and extra-hepatic tissues. *Xenobiotica* 2012; 42: 1096-1109.
