# Supplementary material for: DNA elements for constitutive androstane receptor- and pregnane X receptor-mediated regulation of bovine CYP3A28 gene
Source: PubMed Central journal article supplement (PMC6433341; doi:10.1371/journal.pone.0214338), 2019-03-25
Supplement: pone.0214338.s018.pdf [file pone.0214338.s018.pdf]

**Title: DNA Elements for Constitutive Androstane Receptor- and Pregnane X Receptor-mediated Regulation of Bovine *CYP3A28* Gene**

**Authors:** Mery Giantin, Jenni Küblbeck, Vanessa Zancanella, Viktoria Prantner, Fabiana Sansonetti, Axel Schoeniger, Roberta Tolosi, Giorgia Guerra, Silvia Da Ros, Mauro Dacasto, Paavo Honkakoski

**Journal:** Plos One

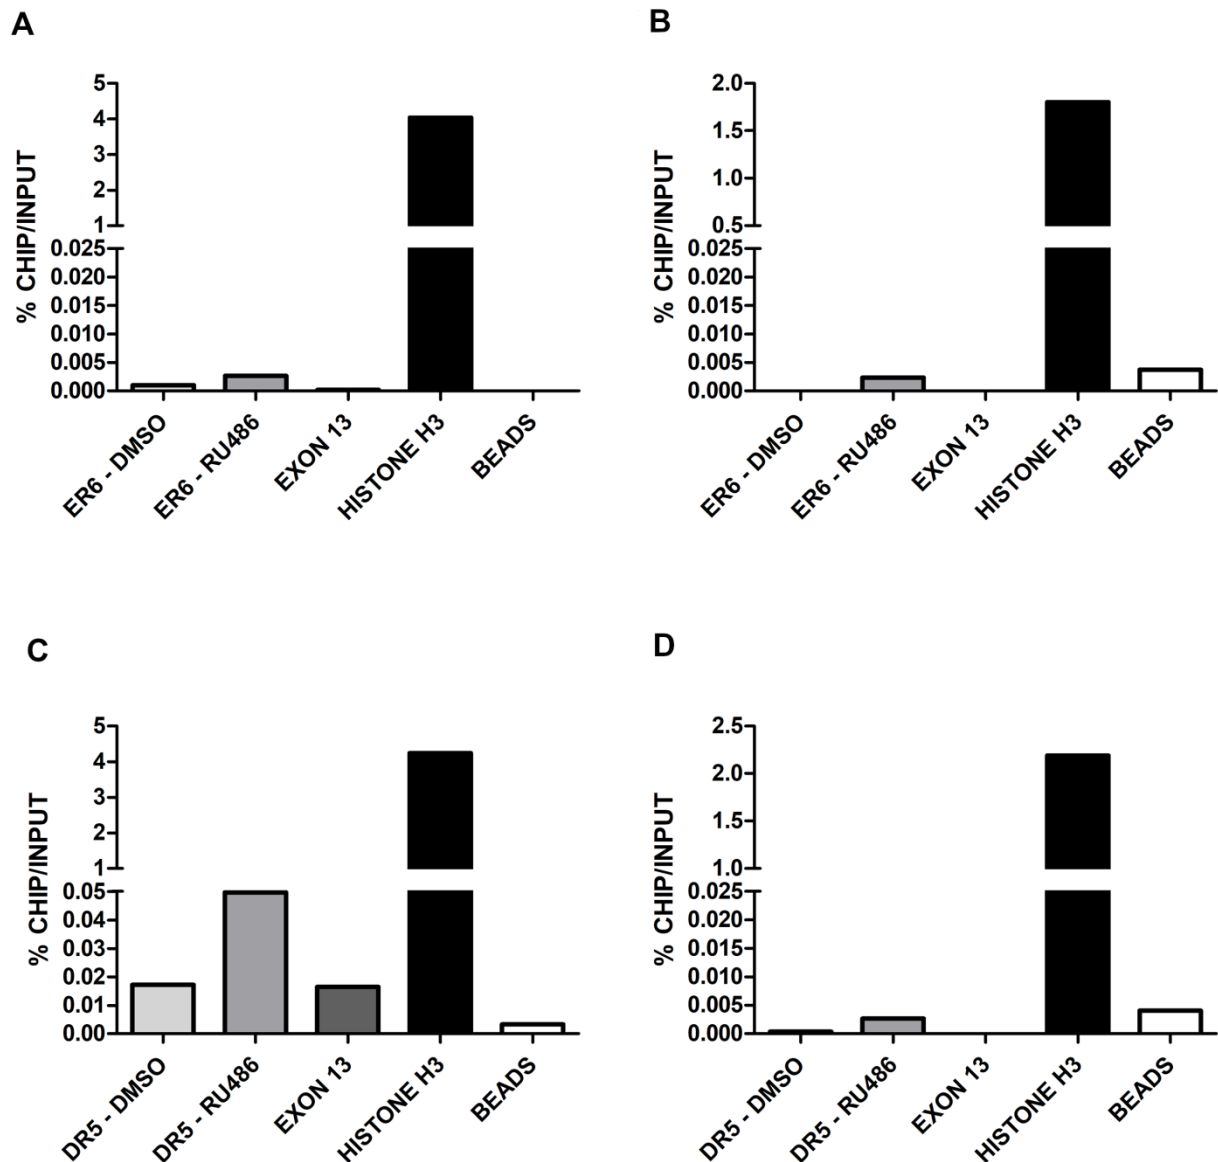

**S9 Fig. ChIP in control and treated BFH12 cells to quantify the binding of RXR $\alpha$  to ER6 and DR5 binding sites.** BFH12 cells were exposed to 0.1% DMSO and 100  $\mu$ M RU486 for 6 hours. Chromatin was isolated, subjected to ChIP using anti-human RXR $\alpha$  antibody and quantified by qPCR as described in S1 File. Results for ER6 and DR5 DNA regions are reported in panels A-B and C-D, respectively. The data shown derived from two further independent experiments; they are

normalized to input DNA and expressed as % ChIP/input. The experiment was performed four times independently, and similar results were obtained. Chromatin samples from control cells immunoprecipitated with or without Histone H3 antibody are shown as Histone H3 and beads, respectively. A further negative control (exon 13), representing a *CYP3A28* DNA region without NR binding sites, is reported in the graph. In all experiments, negative and positive controls behaved as expected.
